# Supplementary material for: Missed opportunities for earlier diagnosis of HIV infection in people living with HIV in Thailand
Source: PLOS Glob Public Health. 2022 Jul 29;2(7):e0000842. doi: 10.1371/journal.pgph.0000842 (PMC10021504; doi:10.1371/journal.pgph.0000842)
Supplement: S1 Data — (XLSX) [file pgph.0000842.s001.xlsx]

## Sheet: Data
ID	Hospital	Gender	Race	Date_HIV_Dx_BE	Age at HIV Dx	Reasons for testing	Remark	Weight	Height	BMI	Site of testing	Ordered physician	Specialty	Remark	Prior HIV test	Date	HIV risk	U/D	Remark	CD4	Percent	Date	HIV RNA	Date	Hb	HCT	WBC	Plt	AST	ALT	Cr	eGFR	No. missed	Missed_1	Date missed1	Diagnosis	Code	weight	wt loss	Site of presentation	Doctor	specialty	Remark	Hb	HCT	WBC	Plt	AST	ALT
R001	0	0	0	2562-01-02	42.0014	6	PCP	63	173	21.0498	1	3	1.1		0		5	7	Sinusitis, Angular cheilitis	36	6	2562-01-04	141665	2562-01-04	11.6	31.3	6120	278000	117	77	0.57	126.7	0
R004	0	0	0	2562-01-09	28.9008	0					2	3	2		0		5	0															0
R007	0	0	0	2562-01-14	55.0719	0		65.3	168.7	22.9447	2	3	1.1		1	2561-08-01	2	6	HBV	221	19	2562-01-14	52066	2562-01-15	14.7	44.4	6840	257000	30	27	1.23	65.7	0
R010	0	0	0	2562-01-15	20.668	1		54.5	163	20.5126	2	3	2		0		5	0															0
R011	0	0	0	2562-01-18	26.9651	6	TB cervical LN	64.5	171	22.0581	2	3	1.1		0		5	0		105	9	2562-02-08	2243179	2562-02-12	12.5	38	5260	247000	26	5	0.66	133.4	1		2562-01-11	TB LN	19	64.4	-0.1	2	1	7
R013	0	0	0	2562-01-18	46.2834	1		79.7	176	25.7296	2	1	2		0		5	0							12	36.4	7440	351000			0.94	96.8	0
R014	0	1	0	2562-01-20	36.3285	2		82.3	157	33.3888	2	3	5		0		0	0							12.8	37.4							0
R015	0	0	0	2562-01-22	27.4716	6	Cervical LN, Wt loss	48.9	163.1	18.3823	2	3	7		0		0	0		17	4	2562-01-25			10	27.9	9000	222000	46	26	0.72	127.8	1		2562-01-17	Neck mass	33			0	1	4
R018	0	0	0	2562-02-01	38.2916	6	Psoriasis	44.6	166.3	16.1269	2	3	1.2	Skin	0		2	0		190	13	2562-02-12			11.5	36.5	4860	248000	29	15	0.65	123.4	0
R019	0	1	0	2562-01-10	50.1328	6	STD	45.2	153.5	19.1832	2	1	3		1	2561-08-02	0	1		521	26	2562-02-05			9.7	28.6	10020	529000			0.74	94.5	0
R026	0	0	0	2562-02-11	33.0979	6	Dermatitis	63.5	168.6	22.3387	2	3	1.2	Skin	0		0	0							11.3	35.1	6090	290000	30	28	0.84	115	1		2562-02-04	Dermatits	42	65.4	1.9	2	3	1.2	Skin
R032	0	0	0	2562-02-25	37.1225	1		76.7	167.1	27.469	1	1	8		0		5	0							15.2	44.7	7000	237000			0.81	113.5	0
R033	0	0	0	2562-02-27	23.3703	1		50	174	16.5147	2	3	6		0		5	0							11.7	36.2	4430	209000					0
R035	0	1	0	2562-03-04	41.9165	3		50.8	161.3	19.5252	2	2	1.1		1	2560-10-25	0	3, 7	RA, Endometriosis	274	13	2562-03-05	110275	2562-03-13	11.8	34.9	7530	346000	27		0.65	110.3	0
R036	0	0	0	2562-03-05	43.3867	1		60.6	168.6	21.3185	2	3	2		0		5	2, 7	TB LN														0
R044	0	0	0	2562-03-15	58.5435	6	PPE, Dermatits	68.2	168	24.1638	2	3	1.2	Hemato	0		0	1		35	12	2562-04-03	303874	2562-04-05	12.2	37.4	3790	194000	22	10	0.89	94.2	0
R046	0	1	0	2562-03-20	61.7495	1		59.2	142	29.3593	2	1	6		0		0	7	Cataract	260	13	2562-03-29			10.4	31.8	5190	267000			0.69	94	0
R047	0	1	0	2562-03-22	34.9569	6	Cervical LN	47.4	156.3	19.4026	2	1	1.2	Hemato	0		0	0		2	2	2562-03-25	52783	2562-03-27	11.7	34.9	4920	320000	180	7	0.55	122.4	2		2562-03-21	Cervical LN	33	48.6	1.2	2	1	7
R050	0	1	0	2562-03-25	63.2854	1		48	165	17.6309	2	1	6		0		0	7	COPD	221	28	2562-08-02			13.1	40.2	5440	257000			0.91	89.4	0
R051	0	0	0	2562-03-26	36.2519	6	Urticaria(Chronic)	81.8	186	23.6444	2	3	1.2	Skin	0		2	0		122	4	2562-04-25	597424	2562-04-26	12.1	37.3	6580	116000					0
R055	0	0	0	2562-04-03	75.0773	1		70	162	26.6728	2	3	6		0		0	3, 4, 7	BPH						12.4	37.4	6990	356000					0
R056	0	1	0	2562-04-04	39.6413	6	subacute fever	59.5	164.2	22.0684	2	3	1.2	Rheumato	0		0	0		314	20	2562-04-05	386036	2562-04-02	12.7	39.1	10400	303000	22	26	0.68	110.2	0
R057	0	1	0	2562-04-05	31.2799	6	Cervical LN	56.8	162.6	21.4836	2	1	7		0		0	0							9	27.4	8990	487000			0.8	119	0
R059	0	0	0	2562-04-11	40.3751	6	Fever c rash	73	173	24.3911	2	1	1.2	Skin	0		5	0		507	18	2562-04-22			12.4	37.3	6930	312000	103	230	0.84	109.5	0
R062	0	1	0	2562-04-22	56.7858	1		59.8	152	25.883	2	1	8		0		0	3		1489	29	2562-05-24			13.9	37.7	8870	207000	44	51	0.56	104.2	0
R066	0	0	0	2562-04-29	30.9925	6	Cervical LN	58.4	171.2	19.9253	2	1	7		0		2	0		85	6	2562-05-08	209032	2562-05-08	10.7	32.2	13470	442000	112	191	0.91	111.9	0
R068	0	0	0	2562-05-08	31.4059	6	Herpes zoster	74.7	164.9	27.4713	2	3	1.2	Skin	0		2	0		201	8	2562-06-24			14.4	45.3	10910	267000					1		2561-05-29	Anal wart	54	71.3	-3.4	2	3	5		14.5	46.4	8310	304000	31	72
R070	0	0	0	2562-05-12	51.4908	6	Psoriasis	58.3	161.7	22.2971	2	3	1.2	Skin	0		5	0		40	3	2562-05-21			9.5	27.6	5430	119000	22	19	0.91	97.2	0
R072	0	1	0	2562-05-13	52.0356	6	Dermatitis	70	154	29.5159	2	3	1.2	Skin	0		0	0		162	7	2563-01-23			11.9	36.8	5260	207000	33	8	0.48	112.8	0
R074	0	1	0	2562-05-13	74.36	1		43.5	158.3	17.3591	2	3	6		0		0	3							10.6	32.3	7700	274000	28	13	0.64	87.9	1		2562-05-10	Wt loss	51	42.2	-1.3	2	3	5
R078	0	0	0	2562-05-20	28.2437	2		53.5	173.8	17.7115	2	3	5		0		5	0							8.5	25.6	3180	284000	57	40	0.72	126.9	0
R079	0	0	0	2562-05-21	40.6379	6	pulTB	50.3	160	19.6484	2	2	1.2	Pulmo	0		0	0							9.7	30.7	5050	285000	114	144			1		2561-01-07	Herpes zoster	40			2	1	4
R081	0	0	0	2562-05-23	51.7591	6	STD	70	168	24.8016	2	3	6		0		2	0		183	9	2562-06-14	544000	2562-06-14	7	21	4080	228000	39	24	0.95	92.3	0
R083	0	0	0	2562-05-27	40.7255	0		55.6	166	20.1771	2	3	1.1		0		0	0		244	16	2562-05-29	92569	2562-06-06	12.2	36.4	7270	209000	35	24	0.87	108	0
R085	0	1	0	2562-05-28	53.4702	1		51.7	154.6	21.6307	2	1	8		0		0	3, 7	Spinal stenosis	69	8	2562-06-10	313058	2562-06-18	9	27.9	3200	164000	37	18	0.55	107.1	1		2561-12-18	Bronchitis	51, 55	53.9	2.2	2	1	5		8.5	26.9	4200	279000
R090	0	0	0	2562-06-04	50.7652	6	HCV	66.8	170	23.1142	2	3	1.2	GI	0		0	0		142	20	2562-06-18			11.6	30.4	2870	93000	200	201	0.96	64.9	0
R096	0	0	0	2562-06-08	28.5476	1		77	162	29.34	2	3	6		0		2	0							14.1	41.5	5130	238000	51	105	0.88	116.9	0
R097	0	0	0	2562-06-11	51.6304	1		67.9	171.5	23.0856	2	3	2		0		0	7	Pituitary adenoma	129	12	2562-06-27	8009	2562-07-01	9.4	29.5	3630	217000	30	16	1.02	84.7	0
R099	0	0	0	2562-06-13	40.345	6	Kaposi Sarcoma	59.5	171.2	20.3006	2	1	1.2	Skin	0		2	0		58	5	2562-07-09	269000	2562-07-10	11.8	36.9	4530	230000	23	11	0.87	108	0
R101	0	0	1	2562-06-19	66.2478	6	Lymphadenopathy	83.7	172.2	28.2266	2	3	1.2	Pulmo	0		0	1, 3		418	16	2562-07-04	527030	2562-07-03	11.7	33.6	6270	194000	66	36	0.93	85.2	0
R102	0	1	0	2562-06-20	29.9165	6	Cervical LN	83	153	35.4564	2	3	5		0		0	0		904	24	2562-07-04	9049	2562-06-25	13.2	39.4	11900	299000	22	21	0.51	129.9	0
R103	0	1	0	2562-06-21	43.551	1		69.6	158	27.8801	2	3	12		0		0	0							12.6	38.2	6500	424000	22	21	0.73	100.9	0
R105	0	0	0	2562-06-24	45.2758	6	pulTB, PCP	58.8	165	21.5978	2	3	5		0		0	0		46	5	2562-06-27	525697	2562-06-28	9.8	32.4	4700	91000	66	36	0.76	110.2	0
R107	0	0	0	2562-06-25	29.6865	0		80.5	176	25.9879	2	2	1.1		0		2	0							13.3	41.3	5810	248000	32	55	1.09	91.2	0
R108	0	0	0	2562-06-27	62.8583	6	Wt loss	67.8	168	24.0221	2	1	1.2	Gen	0		0	0		59	8	2562-06-28	2272201	2562-07-01	8.1	23.9	3910	284000	65	37	0.84	93.8	1		2562-06-20	Wt loss, Chronic cough	51, 57			0	1	4		8.1	25	3900	273000	61	25
R112	0	1	0	2562-07-03	63.499	0		59.2	155	24.641	2	2	1.1		0		0	1, 3, 4		503	19	2562-07-08	164635	2562-07-09	8.2	26	6970	384000	40	27	1.17	49.6	0
R117	0	0	0	2562-07-10	44.2026	1		74	172	25.0135	2	3	8		0		0	7	Spondylosis, HNP						15.4	44.9	9560	292000			0.74	113	0
R121	0	0	0	2562-07-15	27.2498	1		52.1	163	19.6093	2	3	6		0		2	0							16.2	46.9	7390	322000					0
R123	0	1	1	2562-07-20	62.2806	1		51	160	19.9219	1	2	1.2	Cardio	0		0	1		135	16	2562-07-22	185904	2562-07-23	8.9	26	11140	93000	57	54	1.26	45.6	0
R124	0	1	0	2562-07-24	47.1595	6	Herpes zoster	73	167	26.1752	2	1	6		0		0	0							13.9	39.9	7820	322000	18	10	0.73	98.1	0
R125	0	0	0	2562-07-26	23.4743	1		45.6	162.9	17.1839	2	1	7		0		0	0					48115	2562-08-06	14.2	40	6270	289000	21	9	0.9	120	0
R126	0	0	0	2562-08-01	47.2115	6	PPE, Oral candidiasis	67.3	162	25.644	2	3	1.2	Skin	0		0	0		40	6	2562-08-05			12.8	38.6	6820	250000	406	277	0.91	100	1		2562-07-25	Oral candidiasis	52	67.9	0.6	2	3	1.2	Skin
R129	0	0	0	2562-08-02	34.319	6	STD	64.8	162.9	24.4193	2	3	1.2	Skin	0		5	0															0
R133	0	1	0	2562-08-09	21.3525	0		47	158	18.8271	2	2	1.1		0		0	0															0
R134	0	0	0	2562-08-13	27.6386	6	Dermatitis	63.1	165	23.1772	2	3	1.2	Skin	0		2	0		11	1	2562-08-19	216360	2562-08-21	13.3	41.4	3700	277000	52	109	0.72	127.8	1		2562-07-08	Chronic eczema	58	62.9	-0.2	2	1	1.2	Skin
R139	0	0	0	2562-08-19	34.7187	6	STD	57	170	19.7232	2	3	6		0		2	0							12.9	37.8	4230	263000			0.84	114.2	0
R141	0	0	0	2562-08-20	32.397	6	Nasal mass > histoplasma	52.9	174.1	17.4525	2	3	7		0		2	0		49	2	2562-08-23	592157	2562-08-27	9.5	31.1	5350	294000	36	24	0.7	124.9	0
R142	0	1	0	2562-08-22	34.935	6	Nasal mass	42.8	152.5	18.4037	2	1	7		0		0	0							9.8	31.4	5510	761000			0.58	120.3	0
R143	0	0	0	2562-08-22	39.2854	6	PCP	63.6	173.3	21.1768	2	3	1.2	Pulmo	0		2	0		658	15	2562-08-27	683802	2562-08-27	12.3	37.8	14200	350000	29	37	1.13	81.4	0
R146	0	0	0	2562-08-26	39.7864	6	Dermatitis	59.4	170.7	20.3854	2	3	1.2	Skin	0		0	0		12	2	2562-09-09			16.1	47.8	4940	159000	35	33	0.9	107.2	0
R152	0	0	0	2562-09-10	25.7632	6	Wt loss	44.9	165.3	16.4324	2	1	1.2	Gen	0		2	0		343	18	2562-09-11	87066	2562-09-11	7.8	25.5	6810	399000	25	11	0.83	122.3	1		2562-09-07	Proctitis R/O GC	30	45.2	0.3	2	3	2
R156	0	0	0	2562-09-16	27.718	6	PCP	50.6	170	17.5087	2	2	1.2	Pulmo	0		2	0		5	1	2562-09-17			11.6	35.7	4070	296000	43	39	0.71	128.6	0
R159	0	1	0	2562-09-23	53.5578	1		46.5	150	20.6667	2	3	12		0		0	0		169	24	2562-10-04	24310	2562-10-08	11.8	34.3	3850	154000	38	26	0.7	98.9	2		2560-06-07	Cervical LN	33	50.4	3.9	2	3	1.1
R161	0	0	0	2562-09-25	37.8727	1		109.4	178.2	34.451	2	3	6		0		5	0							13.4	41	6140	237000					0
R162	0	0	0	2562-10-04	34.8282	6	Dermatitis	54.1	161.1	20.8452	2	3	7		0		0	0		113	5	2562-10-21	47456	2562-10-22	14.7	41.9	5930	220000	28	34	0.94	105.4	0
R163	0	1	0	2562-10-07	22.1437	6	pulTB	47.8	155	19.8959	2	2	1.2	Pulmo	0		0	0		18	5	2562-10-16	179603	2562-10-21	9.5	29.8	2720	459000					1		2562-09-30	Wt loss, R/O pulTB	51, 57			2	1	5
R167	0	0	0	2562-10-09	57.4155	1		75.6	163.9	28.1426	2	2	1.2	Cardio	0		0	7	DCM	569	23	2563-01-30	2546	2563-01-31	16.1	47.7	8800	170000			1.34	58.4	0
R170	0	0	0	2562-10-11	52.9008	6	R/O Lymphoma	71.7	170	24.8097	2	3	1.2	Hemato	0		0	0		131	6	2562-10-15	42465	2562-10-17	12.8	38.2	6640	276000	88	94	1.83	41.5	0
R172	0	0	0	2562-10-16	37.7166	6	pulTB	45.5	160.2	17.7291	2	2	1.2	Pulmo	0		0	0		2	1	2562-10-22			8.7	27.9	6980	392000	30	55	0.56	132.1	0
R176	0	0	0	2562-10-18	53.1636	0		98.7	173.3	32.864	2	1	7		0		0	1, 3		1021	22	2562-10-30			14.8	43.5	7390	224000			0.88	98.1	0
R182	0	0	0	2562-10-27	44.8925	0		120.6	171.5	41.0033	2	3	1.1		0		0	1, 3, 4		446	11	2562-10-30	93282	2562-10-30	15.1	43.1	8440	219000	63	99	0.91	102.1	0
R184	0	0	0	2562-10-29	33.1253	6	Syphilis	75.1	175.4	24.4107	2	3	1.2	Skin	0		2	0															0
R190	0	0	0	2562-11-07	55.614	1		66.7	164	24.7992	2	1	2		0		2	0		164	8	2562-11-18	131325	2562-11-19	13.7	40.4	6730	202000			0.97	87.5	0
R196	0	1	1	2562-11-15	66.1465	1		56.9	160	22.2266	1	3	2		0		0	1, 6	HCC	167	25	2562-12-23	421346	2562-12-24	12	35.4	2860	88000	99	103	0.44	105.2	0
R202	0	1	0	2562-11-23	42.5955	1		46.5	158.9	18.4164	2	3	2		0		0	0															0
R206	0	1	3	2562-11-27	36.961	6	PCP	49.2	161.7	18.8168	2	3	1.2	Pulmo	0		0	0		17	6	2562-12-13			9.1	27	10800	479000	49	14	0.72	107.7	0
R212	0	0	0	2562-12-09	33.2485	0		103.6	172.6	34.7759	2	3	1.2	Pulmo	0		2	7	OSA	470	25	2562-12-20			14.6	42.2	6230	261000			1.01	97.3	0
R222	0	1	0	2562-12-26	35.6797	1		86.6	159.5	34.0405	2	3	2		0		0	0		411	23	2563-01-10	76226	2563-01-14	11.9	36.3	4390	347000	53	176	0.67	113.9	2		2562-05-03	Herpes zoster	40	89.5	2.9	2	1	1.2	Skin
R223	0	0	0	2563-01-03	23.54	6	PPE	54.6	159.6	21.4352	2	3	1.2	Skin	0		2	0							13.9	40.8	4460	243000					0
R224	0	0	0	2562-03-16	64.0301	1		62	167	22.231	0	1	6		0		0	3		202	12	2562-03-18	70825	2562-03-20	14.9	45.3	7400	161000	26	13	0.99	80.2	0
R231	0	1	0	2562-12-20	62.7132	6	R/O Lymphoma	63.2	161.4	24.2611	0	1	1.2	Gen	0		0	0		250	10	2562-12-23	6535	2562-12-26	8.5	26.1	6600	176000	52	31	0.92	66.7	0
R232	0	0	0	2563-01-16	57.399	6	R/O CA Lung, Wt loss	53	175.1	17.2864	2	3	1.2	Pulmo	0		0	0		232	20	2563-02-07	70200	2563-02-18	11.9	34	8430	497000	36	36	0.62	110.1	0
R235	0	1	0	2563-01-20	51.6632	6	AKI, Acute GN	62	160	24.2188	2	2	1.2	Nephro	0		0	0		202	10	2563-01-28			11.4	34.3	9480	364000	31	14	1.3	47.5	0
R236	0	0	0	2563-01-20	36.7885	6	pulTB				2	3	1.2	Pulmo	0		5	0		159	10	2563-01-28	639493	2563-01-29	9.9	30.8	5620	441000	54	32	0.88	110.5	0
R239	0	1	0	2563-01-23	57.5113	6	PPE, Wt loss	46.6	165	17.1166	2	3	1.1		0		0	1		79	5	2563-01-24			10.8	33.6	8780	424000	25	16	0.58	102.3	0
R242	0	1	0	2563-02-03	23.0472	6	Hearing loss	41.4	155.6	17.0994	2	1	7		0		0	0															0
R248	0	0	0	2563-02-11	51.9452	6	Dermatitis	73.4	163.4	27.4911	2	3	1.2	Skin	0		0	0							13.5	38.4	3950	240000					0
R253	0	0	0	2563-02-21	36	1		58.9	173	19.6799	2	1	7		0		2	0		337	13	2563-03-13			13.2	40.8	7030	259000	26	29	0.7	121.4	0
R254	0	0	0	2563-02-24	59.206	6	PPE, Wt loss	80.6	172	27.2445	2	3	1.2	Hemato	0		5	0		101	10	29/2/2563	566687	2563-02-26	9.9	28.8	3890	144000					3		2563-02-06	Folliculitis	34, 59	82.8	2.2	2	3	1.2	Skin	10.1	29.3	4040	156000	35	22
R262	0	0	0	2563-03-06	19.384	6	pulTB	79.1	186.4	22.7659	2	3	1.2	Pulmo	0		2	0		234	6	2563-03-20	614	2563-04-22	13.8	42.4	8110	342000	22	16	0.74	133.7	0
R265	0	1	0	2563-03-15	59.3593	6	Wt loss	41.3	152.4	17.782	2	3	1.2	GI	0		0	6	NAFLD	46	5	2563-03-16	417375	2563-03-18	11.9	36	4340	161000	45	24	0.64	97.7	0
R266	0	0	0	2563-03-16	17.2895	1		115.4	183.1	34.4214	2	3	12		1	2558-05-18	2	7	ALL, VitD def	201	12	2563-03-19			14.8	43.7	7620	227000			0.83	129.4	0
R269	0	0	0	2563-03-18	43.8905	6	pulTB	54.7	163	20.5879	2	3	1.2	Pulmo	0		2	7	Allergic rhinitis	200	11	2564-05-14	218562	2563-04-08	11.2	34.4	8940	318000	21	9	0.96	96.4	0
R274	0	0	0	2563-04-09	50.2012	6	Lymphoma	69.4	172	23.4586	2	1	1.2	Gen	0		2	1		94	11	2563-04-10	23608	2563-04-14	15.2	51.1	5630	173000	31	39	0.76	106.4	2		2563-04-04	Lymphoma	36	70.2	0.8	2	3	7
R275	0	0	0	2563-04-09	28.2382	6	Syphilis	56.3	171.9	19.0527	2	1	1.2	Skin	0		0	0															0
R279	0	0	0	2563-05-06	34.0589	1		44.4	170	15.3633	2	3	2		0		2	0		81	12	2563-05-08	683556	2563-05-13	8.7	27	4840	175000	39	14	0.87	112.6	0
R280	0	0	0	2563-05-07	45.7413	6	AFI	63.2	176	20.4029	2	3	1.1		0		5	4		556	13	2563-05-08	9566357	2563-05-13	15.5	44.6	10180	347000	28	16	0.85	105.2	0
R281	0	1	0	2563-05-13	52.6407	1		61.4	162.3	23.3094	2	3	12		0		0	0		70	10	2563-05-25	35242	2563-05-27	11.9	37.3	2530	232000	22	22	0.63	103.1	0
R282	0	0	0	2563-05-15	21.9959	6	Wt loss	47	177.4	14.9345	2	1	1.2	Skin	0		5	0		33	5	2563-06-01			10.6	31.3	3430	234000			0.68	135.6	0
R285	0	0	0	2563-05-20	29.6646	6	Syphilis				2	2	1.1		1	2560-01-01	2	6	HBV	396	31	2563-05-22	27638	2563-05-22	13.9	43	3870	249000	29	53	0.91	113.5	0
R290	0	1	0	2563-05-30	33.514	4		46.5	164	17.2888	2	3	3		0		0	0		316	16	2563-06-17	8607	2563-06-17	10.5	31	5820	298000	16	17	0.51	126.3	0
R295	0	0	0	2563-06-04	40.0192	1		62.8	169.4	21.8843	2	3	2		0		5	0							15.4	46.9	5610	223000	33	51	0.87	108	0
R297	0	0	0	2563-06-05	23.3895	1		60.2	169.9	20.855	2	3	1.2	Skin	0		2	0															0
R301	0	0	0	2563-06-23	33.4648	7		89.7	178	28.3108	2	3	3		0		0	1		439	17	2563-08-19	18734	2563-08-20	16.3	50.5	6580	256000					0
R309	0	0	0	2563-07-10	36.501	6	STD	53.6	166.7	19.2883	2	1	1.2	Skin	1	2561-12-25	0	0		276	13	2563-07-17			15.1	42.7	4340	237000	24	27	0.98	98.8	0
R312	0	0	0	2563-07-15	25.3854	6	Syphilis	84.2	173.4	28.0036	0	1	1.2	Gen	0		2	0							14.9	43	7380	309000	26	36	0.98	106.7	0
R314	0	0	0	2563-07-21	19.7317	1		60.3	167.7	21.4413	2	1	2		1	2562-09-26	2	0		465	18	2563-08-26			14.1	42.5	7650	346000			0.77	131.6	0
R328	0	0	0	2563-08-18	60.5832	6	pulTB	59.5	175	19.4286	2	2	1.2	Pulmo	0		0	0		123	14	2563-08-25			5.8	16.5	4510	161000	30	42	1.39	54.7	4		2563-08-14	Wt loss	51	57.8	-1.7	2	3	1.2	Neuro	6.2	18.5	4400	156000	33	44
R329	0	1	0	2563-08-18	62.0862	1		54.2	152	23.4591	2	3	8		0		0	0		245	28	2564-06-07	6347	2564-06-09	12.7	38.5	5900	251000					0
R331	0	0	0	2563-08-19	26.0287	6	PPE	59.7	166.6	21.5092	2	3	1.2	Skin	0		5	0															0
R332	0	0	0	2563-08-22	32.386	1		55.4	165.6	20.2018	2	3	7		0		2	0		418	30	2563-08-31			15.8	45.5	5800	294000					4		2563-08-02	Cervical LN	33	55.4	0	2	3	7
R334	0	0	0	2563-08-25	69.6427	1		67.8	162.4	25.7074	2	3	6		0		0	5	Renal stone						13.5	39	7980	135000			1.55	45	0
R335	0	1	0	2563-08-25	40.5804	6	Pancytopenia	56	156.4	22.8936	2	3	1.2	Skin	0		0	0							11.3	33.3	2900	79000			0.54	118	0
R337	0	0	0	2563-08-26	39.7207	6	PPE	90.1	171.4	30.6693	2	3	1.2	Skin	0		2	0		108	5	2563-09-11	234657	2563-09-15	15.4	47.4	7190	178000	95	135	0.88	108.2	0
R347	0	0	0	2563-09-21	23.4716	6	Syphilis	86.7	169	30.3561	2	1	1.2	Skin	0		2	0															0
R349	0	0	0	2563-09-30	65.4921	1		52.4	166	19.0158	2	3	2		0		5	7	Cerebellar hemangioma	310	9	2564-01-08			12.9	38.7	5740	196000			0.92	88	0
R352	0	1	0	2563-10-06	49.7029	6	Chronic diarrhea	46.8	159.1	18.4887	2	3	1.2	GI	0		0	0		15	1	2563-10-09	111462	2563-10-14	8.6	30.6	7770	531000	32	32	0.44	121.1	0
R353	0	1	0	2563-10-08	37.1499	2		54.1	160.9	20.8971	2	3	14		0		0	0		646	28	2563-10-26	10458	2563-10-28	13.7	42.6	5350	214000	20	17	0.74	105.7	0
R354	0	1	0	2563-10-09	33.0021	6	CA Cervix	47.8	167	17.1394	2	3	3		0		0	0		336	20	2563-10-19			11.9	36.8	12010	235000		15	0.78	102	0
R357	0	0	0	2563-10-20	28.9884	1		79.2	180.8	24.2286	2	3	2		0		2	0		54	5	2564-02-08			15.6	46.7	6100	286000					0
R358	0	1	0	2563-10-20	48.1095	1		60.5	156.1	24.8284	2	1	2		0		0	7	CA Breast	161	11	2564-05-17			10.5	31.2	5880	269000			0.74	109.1	3		2563-10-01	Parotid Lymphoid mass	33	58.7	-1.8	2	2	1.2	Hemato	10.8	31	6470	244000
R359	0	0	0	2563-10-26	54.694	1		60.2	185	17.5895	2	2	1.2	Neuro	0		2	7	CVA	197	8	2563-11-04	530542	2563-11-04	12.3	35.1	5120	170000					0
R360	0	0	0	2563-10-26	22.5298	1		75	185	21.9138	2	3	6		0		2	0		79	5	2563-11-02			12.9	42.2	13210	279000	42	48	0.83	124.9	0
R361	0	0	0	2563-10-26	35.9343	1		70.2	179.1	21.885	2	3	2		0		2	0		483	11	2563-10-29			8.9	29.1	17100	252000		8	0.78	116.9	0
R362	0	0	0	2563-10-27	44.0274	6	pulTB	51.6	175	16.849	2	3	1.2	Pulmo	0		2	0		6	1	2563-10-28	472633	2563-11-03	11.9	35.9	6690	374000	101	79	0.82	107.5	0
R368	0	0	0	2563-11-16	36.7912	6	subacute fever, Wt loss	71.3	180	22.0062	2	1	1.2	Gen	0		2	0		80	6	2563-11-17	339597	2563-12-08	11.6	34.4	5770	280000	43	27	1.01	95.2	1		2563-11-13	Subacute fever, Wt loss	51, 55			0	1	4
R373	0	0	0	2563-11-26	43.7098	6	Uveitis	63.2	166.2	22.8799	2	3	6		0		2	0		49	3	2563-11-27	270745	2563-12-01	12.2	37.2	9690	258000	34	32	1.08	83.6	0
R376	0	0	0	2563-11-30	63.718	0		61.7	167	22.1234	2	3	1.1		0		5	0															0
R381	0	0	0	2563-12-21	30.2834	1		57.2	166.7	20.5838	2	3	7		0		2	7	Grave's disease	177	8	2563-12-23			11.3	36.4	4620	95000	49	58	0.78	121.1	0
R382	0	0	0	2563-12-21	35.2991	6	pulTb, Dermatitis	62.8	180	19.3827	2	2	1.2	Pulmo	0		2	0		38	5	2564-01-21			11.7	37.7	4860	371000	42	37	0.7	122.3	1		2563-12-16	pulTB	20	62.3	-0.5	2	1	5		11.9	38.1	4390	337000
R383	0	0	0	2563-12-22	78.1848	1		56	158.5	22.291	2	3	1.2	Cardio	0		0	5, 7	KT, SSS	122	16	2564-03-18	1457674	2564-03-18	12.7	38.7	4660	101000	44	27	1.13	61.9	1		2563-10-06	KT, thrombocytopenia	34	54.2	-1.8	2	3	1.2	Nephro	12.5	37.2	4940	113000	38	34
R387	0	0	0	2563-12-29	55.8768	1		53.8	164	20.003	2	1	7		0		0	0		440	23	2564-01-15			14.4	41.8	8090	247000			0.8	100.6	0
R389	0	0	0	2562-01-06	26.3053	6	PCP	71	183	21.201	0	3	4		0		2	0		88	9	2562-01-07	1414371	2562-01-10	12.4	38.5	5300	212000	80	30	0.77	130.2	2		2561-11-19	Herpes zoster	40	77.1	6.1	2	1	1.2	Skin
R390	0	0	0	2562-01-16	30.5982	6	pulTB	47.5	172	16.056	2	1	5		0		2	0		16	1	2562-02-06	208000	2562-02-07	10.5	32	7700	317000	35	12	0.84	117.5	0
R393	0	0	0	2562-01-22	32.2902	6	pulTB	78.7	178	24.839	0	1	4		0		2	0		72	11	2562-01-23	1927018	2562-01-26	11.5	35.8	9700	312000	63	104	0.77	120.1	0
R394	0	0	0	2562-02-02	22.7433	1		69.7	172.5	23.4237	0	1	8		0		2	0		252	16	2562-02-08	19389	2562-02-12	15	46.3	7600	215000	22	15	0.64	139	0
R395	0	1	0	2562-02-04	44.23	6	pulTB				0	1	4		0		0	0							9	29	10400	662000	27	8	0.66	107.4	0
R396	0	0	0	2562-02-06	28.5448	1					0	1	8		0		5	0							13.4	41.1	13300	181000			0.96	107.1	0
R397	0	1	0	2562-02-07	66.0397	6	pulTB	50.4	154.5	21.1141	0	1	1.2	Gen	0		0	3, 4		201	12	2562-02-11	85963	2562-02-12	7.9	25.4	7100	284000	24	6	0.93	64	0
R398	0	0	0	2562-02-10	31.5154	6	Pancytopenia	74	175	24.1633	0	1	1.2	Gen	0		2	0		5	2	2562-02-11	26915	2562-02-13	12.3	38.9	500	17000	299	71	4.5	16.2	0
R404	0	0	0	2562-02-21	27.1951	0					0	1	4		0		5	0															0
R406	0	0	0	2562-03-03	32.8953	6	PPE				0	1	4		0		0	0							8.3	24.7	5600	188000	155	43	0.81	117.6	0
R409	0	0	0	2562-03-11	43.6851	6	pulTB	47	170.4	16.1867	2	1	5		0		0	0							10.7	33.2	11300	213000	99	58	1.24	70.8	0
R412	0	0	0	2562-03-17	30.0862	1		52	178	16.4121	0	1	2		0		2	0		12	2	2562-03-19	358066	2562-03-20	10.4	31.9	9000	211000	46	29	0.91	112.7	0
R413	0	0	0	2562-03-18	23.6112	0		53.4	165	19.6143	2	1	15		1	2562-01-22	2	7	VHD	397	29	2562-03-28			14.4	44.2	6200	178000	24	14	1.12	88.3	0
R417	0	0	0	2562-04-10	24.8214	6	Cervical LN	60.2	178	19.0001	2	1	5		0		0	0							14.3	44.1	5000	312000	31	34	0.88	120.2	0
R418	0	0	0	2562-04-15	51.8166	1		64	166.7	23.0308	1	1	2		0		0	3		219	25	2562-04-17			16.4	51.5	7100	186000	29	26	0.99	87.8	0
R419	0	0	0	2562-04-16	42.5407	1		68.5	163	25.7819	0	1	2		0		0	1		487	24	2563-01-20			9.5	29.5	20200	323000	27	13	0.79	110.8	0
R420	0	0	0	2562-04-17	41.6756	6	PPE, Wt loss	46	164	17.1029	2	1	5		0		2	0		5	1	2562-04-18			12.7	39.5	1800	334000	35	39	0.64	121.6	0
R421	0	0	0	2562-04-17	24.1232	1					0	1	4		0		2	0							12.7	38.8	6700	179000	36	15	1.04	100	0
R423	0	0	0	2562-05-03	32.9692	6	subacute fever, Wt loss	57.4	164	21.3415	0	1	4		0		2	0		34	9	2562-05-10	238654	2562-05-13	12.3	38.2	4600	57000	41	39	1.04	94.6	0
R424	0	0	0	2562-05-06	30.4695	6	Chronic cough, Wt loss	67.5	170.1	23.3289	0	1	4		0		0	0		56	3	2562-05-13	568521	2562-05-14	12	38.5	9900	329000	47	19	0.88	115.3	0
R427	0	0	0	2562-05-13	21.7002	3		50.8	160	19.8438	2	2	3		0		0	0															0
R429	0	0	0	2562-05-24	29.9548	1		93.9	173	31.3743	1	1	2		0		2	0		45	8	2562-05-27	74497	2562-05-28	13.5	41.5	9400	146000	19	16	1	101.3	0
R430	0	0	0	2562-05-26	50.4942	6	PCP	50.6	151.1	22.1626	0	1	4		0		0	6	Fatty Liver	36	2	2562-05-27			12.3	37.8	7400	221000	67	92	1.07	80.5	0
R431	0	0	0	2562-05-30	50.4093	6	pulTB	56	160	21.875	1	1	1.2	Gen	0		5	0		12	5	2562-05-31			8.8	26.2	7900	264000	83	15	1	87.4	0
R433	0	0	0	2562-06-04	45.807	6	Cervical LN				0	1	4		0		5	0							15.5	45.6	7100	124000	187	139	1.53	54.1	0
R434	0	1	0	2562-06-05	33.6454	6	subacute fever, Wt loss	37.2	156	15.286	2	3	5		0		0	0		7	1	2562-06-10	641028	2562-06-12	8.9	27.1	5710	295000	74	42	0.53	124.8	0
R435	0	0	0	2562-06-08	31.8795	6	Thrombocytopenia				0	1	4		0		2	0							12.3	40.7	4400	9000	110	115	0.75	122.2	0
R436	0	1	0	2562-06-09	29.7796	1		84.4	167.5	30.0824	1	3	2		0		0	0		74	9	2562-06-13			11.7	37.5	6100	216000	71	50	0.62	121.9	0
R437	0	0	0	2562-06-22	43.4305	1		72.3	169	25.3142	1	1	2		0		2	0							10.8	33.1	19900	388000	82	112	1.32	65.6	0
R440	0	0	0	2562-07-10	45.6126	3		70.4	168.2	24.884	2	3	1.1		0		0	0		432	15	2562-07-11	76374	2562-07-12	16.1	47.4	8990	244000	31	25	0.92	100.1	0
R442	0	0	0	2562-07-17	27.551	6	subacute fever, Wt loss				0	1	4		0		5	0							9.9	31.1	8400	162000	92	56	0.88	117.7	0
R444	0	1	2	2562-07-23	47.0637	6	Leukopenia				2	1	4		0		0	0							9.2	28.5	2700	139000	133	74	0.75	94.9	0
R446	0	0	0	2562-08-01	55.4497	6	Chronic diarrhea, Wt loss	47.5	170	16.436	2	3	1.1		0		2	0		160	12	2562-08-09	50844	2562-08-14	13.3	41.5	5300	181000	24	17	0.82	99.6	0
R447	0	1	0	2562-08-02	28.3559	4		58.8	153	25.1185	2	1	3		0		0	0							12	37	7400	258000					0
R448	0	0	0	2562-08-02	42.7132	6	Cervical LN	73	171	24.9649	2	3	5		0		2	0							12	38.4	8100	289000	44	69	0.82	109.1	0
R449	0	1	0	2562-08-08	36.6708	6	STD	85	170	29.4118	1	1	3		0		0	0		152	18	2562-08-15	42793	2562-08-19	14.4	43.2	7800	151000	76	153	0.67	113.1	0
R451	0	0	0	2562-08-17	32.2081	6	Prolong fever, Wt loss	59	167.4	21.0543	0	1	4		0		2	0		17	9	2562-08-19	216000	2562-09-10	5.7	17.8	7600	185000	84	37	2.47	33.2	0
R453	0	1	0	2562-08-20	20.8186	4		48	153	20.5049	2	3	3		0		0	0		291	22	2562-08-27	4909	2562-08-28	10.8	33.7	8400	266000	19	12	0.54	135.8	0
R454	0	1	0	2562-08-27	25.8645	4		52.7	169	18.4517	2	1	3		0		0	0		107	13	2562-09-09	21621	2562-09-11	13.9	42.1	4800	191000	20	10	0.47	137.3	0
R456	0	0	0	2562-09-06	46.0862	6	pulTB	64.4	169.7	22.3626	0	1	1.2	Gen	0		0	0		233	9	2562-09-09			12.6	38.9	7500	234000	37	20	1.02	81.9	0
R457	0	1	0	2562-09-09	48.0274	6	Wt loss	61	165	22.4059	2	3	5		0		0	0		53	5	2562-09-16			8.9	29.3	8200	265000	96	34	0.69	102.9	0
R463	0	0	0	2562-09-27	27.6961	1		58.5	172.6	19.637	2	3	2		0		2	0		28	4	2562-10-02	426843851	2562-10-08	9.7	32	4500	156000	50	40	0.76	125	0
R464	0	1	0	2562-09-30	38.7242	6	pulTB				0	1	4		0		0	0		6	1	2562-10-02			9	27.7	9100	250000	30	10	0.4	132.1	0
R466	0	1	0	2562-10-04	27.6057	4		67	161	25.8478	2	1	3		0		0	0		110	17	2562-11-19	691317	2562-11-21	12.9	40.2	4900	250000			0.51	131.8	0
R467	0	1	0	2562-10-06	30.7023	1		48	146.3	22.426	1	1	2		0		0	0		243	26	2562-10-09			14.4	44.8	4600	255000	24	18	0.47	132.5	0
R468	0	0	0	2562-10-12	28.8734	6	PPE				0	1	4		0		2	0							8.7	28.2	2100	197000	41	5	1.13	88	0
R475	0	1	0	2562-10-30	45.8015	0		58	156.4	23.7113	2	3	3		0		0	7	SLE, Adenomyosis	98	13	2562-11-08	122912	2562-11-12	11.8	34.6	5540	271000	23	23	0.63	108.3	0
R476	0	0	0	2562-10-31	55.5127	0		74.5	172	25.1825	2	1	5		0		0	4		102	10	2562-11-08	171139	2562-11-12	15.9	46.6	5690	305000	35	67	0.77	102.2	22		2562-09-10	SebDermatitis	42	74.3	-0.2	2	3	1.2	Skin
R477	0	1	0	2562-11-04	22.9624	6	Wt loss	39.9	158	15.983	2	1	1.2	Gen	1	2561-06-01	0	0		15	13	2562-11-08			8.4	26.5	8800	192000	56	18	0.62	128	2		2562-10-24	Anal fissure, Wt loss	51	40.7	0.8	2	1	2
R478	0	1	0	2562-11-05	33.5359	6	pulTB				0	1	4		0		0	0		17	6	2562-11-06			12.2	37	16300	114000	95	34	0.93	80.7	0
R479	0	1	0	2562-11-06	24.3066	4		54.5	157	22.1104	2	1	3		0		0	0		455	23	2562-11-19	693	2562-11-20	10.6	33.2	6300	295000	19	14	0.67	123	0
R481	0	0	0	2562-11-08	45.6756	6	PPE, Wt loss	63	165	23.1405	2	1	5		0		5	0		195	6	2562-11-13			10.4	33	10500	705000	40	25	0.8	107.9	0
R483	0	0	0	2562-11-17	53.5222	1					1	1	2		0		0	1, 4		367	26	2562-11-28	19430	2562-12-11	14.5	43.2	6800	206000	36	70	0.81	101.5	0
R484	0	1	0	2562-11-21	39.896	1		78	160	30.4688	0	1	4		0		0	6	Fatty Liver						11	35.4	7200	359000	34	37	0.64	112.4	0
R488	0	1	0	2562-12-02	36.5202	4		49	153	20.9321	2	1	3		0		0	0		349	18	2562-12-09	4653	2562-12-12	10.9	34.8	7900	155000	27	23	0.49	125.3	0
R491	0	1	0	2563-01-02	38.6913	6	pulTB, PCP				0	1	4		0		0	0							10.5	32.2	5600	367000	55	29			0
R493	0	1	0	2563-01-14	48.6762	1		56	160	21.875	1	1	3		0		0	1, 3, 7	Adenomyosis	358	25	2563-01-15	2130	2563-01-16	4	13.7	13000	473000	16	20	0.61	107.2	0
R496	0	1	0	2563-01-28	33.2895	4		85	158	34.049	2	1	3		0		0	0		293	20	2563-02-03	5310	2563-02-03	11.6	36.7	9600	379000	18	10	0.44	132.6	0
R497	0	0	0	2563-01-30	34.486	3		73	173	24.3911	2	1	5		0		0	0															0
R500	0	0	0	2563-02-05	47.1923	1		54.4	165.1	19.9574	0	1	2		0		5	0							8.2	25.2	2000	124000	30	14	0.85	103.8	0
R501	0	0	0	2563-02-06	34.5024	6	PCP	65.8	165	24.169	0	1	4		0		0	0		9	4	2563-02-07			9.6	29.3	9700	366000	55	33	1.18	80	0
R502	0	1	0	2563-02-10	26.2149	1		44.5	151.1	19.4909	1	1	2		0		0	0		154	8	2563-02-13			10.9	32.2	4390	229000	27	15	0.54	130.2	0
R503	0	0	0	2563-02-10	38.2094	6	pulTB	39.5	160	15.4297	0	1	4		0		0	0		3	1	2563-02-11	132000	2563-02-13	13.1	40.1	10800	593000	90	126	0.6	127.5	0
R505	0	1	0	2563-02-12	23.1786	4		60.3	159	23.8519	2	1	3		0		0	0		486	33	2563-02-20			10.8	33.8	10700	322000	20	14	0.4	146.8	0
R510	0	0	0	2563-02-18	27.6632	6	PCP	57	165.7	20.7601	0	1	4		0		2	0		6	1	2563-02-21	101000	2563-02-20	12.1	37.3	7400	355000	41	5	0.87	118.3	0
R512	0	0	0	2563-02-28	24.3778	6	Cervical LN, PPE	67.8	174.1	22.3683	0	1	4		0		5	0							9.8	30.8	9300	364000	32	16	0.84	122.6	3		2563-02-24	Prolong fever, Oral trust	52, 56			0	1	4
R514	0	0	0	2563-03-08	28.5092	6	Cervical LN, PPE	44.8	166	16.2578	0	1	4		0		2	0		6	4	2563-03-09			8.4	26.4	4800	194000	33	15	0.64	133.2	0
R515	0	0	0	2563-03-09	54.4832	6	Pneumonia, PPE	57.7	167	20.6892	0	1	4		0		0	5, 6	Renal stone, HBV				164000	2563-03-30	10.7	31.4	6900	142000	98	17	0.83	99.8	1		2562-12-28	HBV, Thrombocytopenia	31, 34	62.4	4.7	0	1	4		8.3	25.1	7600	130000	74	19
R517	0	0	0	2563-03-16	29.0212	6	PCP	57	174	18.8268	1	1	1.2	Gen	0		5	0		60	8	2563-03-18	197815	2563-03-20	12.1	39.8	7300	172000	31	5	0.84	118.3	0
R518	0	0	0	2563-03-19	25.8809	0		48	170	16.609	2	1	5		0		2	0															0
R519	0	0	0	2563-03-19	22.5298	0		51.9	170	17.9585	2	1	5		0		2	0															0
R520	0	0	0	2563-03-19	45.9849	6	PCP	76.3	173.1	25.4642	0	1	4		0		2	1							9.1	27.8	5300	387000			0.75	110.8	0
R521	0	0	0	2563-03-22	38.6858	6	pulTB	60.1	174.4	19.7598	2	1	4		0		2	7	Thyrotoxicosis						12.2	36.6	7100	299000	28	12	0.74	117	0
R523	0	0	0	2563-04-05	29.0595	6	PCP	45.2	175	14.7592	0	1	4		0		2	0		39	3	2563-04-07	796000	2563-04-07	14.2	47	8200	306000	90	111	0.9	115	0
R524	0	0	0	2563-04-21	30.601	6	Cardiomyopathy	52	178	16.4121	0	1	1.2	Gen	0		0	7	Cardiomyopathy	192	17	2563-04-22	184000	2563-04-24	8.4	33.4	28300	131000	90	34	1.03	97	0
R525	0	0	0	2563-04-22	45.2457	6	pulTB, Oral Candidiasis	42	162	16.0037	1	1	1.2	Gen	0		1	3							11.7	36.7	7200	248000	43	24	0.77	114.6	0
R527	0	0	0	2563-05-02	24.6188	6	Wt loss				0	1	4		0		2	0		11	1	2563-05-05			4.2	13	11500	396000	27	20	1.22	82.5	0
R528	0	0	0	2563-05-04	29.9274	6	pulTB, PCP	60	175	19.5918	0	1	4		0		4	0		6	1	2563-05-08	1832339	2563-05-28	6.7	21	12400	147000	64	11	2.32	36.6	0
R529	0	1	0	2563-05-07	33.0513	6	Wt loss, Oral Candidiasis				2	1	4		0		0	0															0
R531	0	0	0	2563-05-21	21.2183	6	Thrombocytopenia	61.9	176	19.9832	2	1	5		0		2	7	ALL	278	11	2563-05-27	29015	2563-05-29	14.1	45.9	6100	171000	25	32	0.76	130.4	0
R532	0	0	0	2563-06-02	24.0602	6	pulTB	61.4	176	19.8218	2	1	4		0		0	0		52	11	2563-06-08	564687	2563-06-09	11.5	34.9	3100	94000	70	50	1.04	100	0
R535	0	0	0	2563-06-15	20.0876	6	pulTB				0	1	4		1	2559-08-17	5	0		243	19	2563-06-15			10	33.1	25500	258000	55	27	1.2	86.5	0
R538	0	0	0	2563-07-07	41.232	1		66	173	22.0522	0	1	2		0		5	0		55	19	2563-07-09			14.8	44.8	10400	99000	116	50	0.76	86.7	0
R540	0	0	0	2563-07-12	31.1157	1					0	1	4		0		2	0							7.8	25	9700	227000	105	48	0.82	117.8	0
R548	0	0	0	2563-08-31	24.2793	1		68	169	23.8087	0	1	2		0		2	0		240	21	2563-09-02	15134	2563-09-02	16.8	52.2	8300	217000	29	37	0.86	121.4	0
R549	0	1	0	2563-09-02	32.9637	4		55.7	162	21.2239	2	1	3		0		0	0															0
R551	0	0	0	2563-09-07	32.3094	6	pulTB	65.2	172	22.0389	2	1	4		0		2	0							15	45.7	6400	263000			1.01	98	0
R552	0	0	0	2563-09-07	57.9986	1		63.5	165	23.3242	0	1	4		0		0	0		463	11	2563-09-08			13.2	41.4	16200	243000	89	33	1.12	80	0
R554	0	1	0	2563-09-19	63.4661	6	Thrombocytopenia	43	154	18.1312	0	1	1.2	Gen	0		0	1, 3		42	12	2563-09-21			11.3	34	9300	13000	19	12	0.36	117.2	0
R557	0	0	0	2563-10-04	40.3723	6	pulTB	52	173	17.3745	1	1	2		0		2	0		8	1	2563-10-05	1949667	2563-10-07	7.2	22.7	21900	418000	75	27	4.83	14	0
R561	0	0	0	2563-10-09	34.371	1		63.5	165	23.3242	1	1	2		0		0	0		163	14	2563-10-12			16.8	50.6	15600	159000	34	23	0.67	125.4	0
R562	0	0	0	2563-10-13	38.7488	6	PCP	48	150	21.3333	0	1	4		0		0	0					123	2563-10-13	12.5	38.1	7270	308000	45	30	0.68	121.1	0
R566	0	0	0	2563-11-01	30.8939	6	Chronic diarrhea, Oral trust	59	180	18.2099	0	1	4		0		0	0		86	16	2563-11-02	6610	2563-12-02	11.7	35.7	6710	182000	44	34	1.05	94.8	4		2563-08-31	SebDermatitis	42	60.3	1.3	2	1	1.2	Skin
R567	0	0	0	2563-11-03	49.3361	6	Stroke	63.4	165.7	23.0911	0	2	1.2	Neuro	0		6	3, 4		258	14	2563-11-05			13	39.4	5930	165000	23	14	1.18	72	0
R568	0	0	0	2563-11-04	35.2416	6	PPE, Oral candidiasis	63	170	21.7993	0	1	4		0		0	0							14.2	44.3	6350	75000	204	122	0.8	115.7	0
R573	0	1	0	2563-11-20	38.4066	6	R/O TB colitis	39	151	17.1045	0	1	1.2	Gen	0		0	0		7	4	2563-11-23			10.4	32.9	3440	229000	48	22	0.43	131.8	0
R575	0	1	0	2563-11-28	37.0732	1		51	155	21.2279	0	1	2		0		0	0		44	24	2563-12-02			7.7	24.5	12500	362000	11	5	0.51	125.5	3		2563-11-05	LSIL	39			2	1	3
R577	0	0	0	2563-12-09	24.7064	6	Syphilis	51.8	175	16.9143	2	1	5		0		2	0		534	22	2563-12-25			13.9	42.4	7520	429000		20	0.93	114.5	0
R582	0	1	0	2563-12-26	38.371	6	Chronic diarrhea, Wt loss				0	1	4		0		0	0							7.8	25.9	4940	319000	138	54	0.64	115.6	0
S001	1	0	0	2562-01-02	40.9802	5	Drug allergy	76	165	27.9155	1	0	0		0		2	0		79	8.5	2562-01-03			13.5	39.7	9030	237000	22	28	1.04	89.4	2		2561-12-21	Cervical LN	33	78	2	2	3	7		14.8	42.8
S005	1	1	0	2562-01-15	41.9302	5	Anemia	51	163	19.1953	1	0	0		0		0	7	CA Breast	140	17.2	2562-01-21			8.9	28.4	5650	187000	26	35	0.66	110	0
S007	1	0	0	2562-01-23	25.5277	5	Acute fever	74	176	23.8895	1	3	1.2	Gen	0		2	0		317	17.9	2562-02-12			15.4	44.2	4240	170000	59	41	1.17	86.1	0
S008	1	1	0	2562-01-24	37.8426	5	PCP	51	160	19.9219	1	0	0		0		0	0		17	1.9	2562-01-24			10.7	32.1	8090	444000			0.55	120	0
S009	1	1	0	2562-01-28	24.5476	5	Appendicitis				1	0	0		0		0	0		189	19.8	2562-01-28	55018	2562-01-28	11.1	33.8	16300	291000	19	14	0.55	131.7	0
S010	1	1	0	2562-01-29	47.9754	5	pulTB	44	155	18.3143	1	3	1.2	Gen	0		0	0		29	7.7	2562-01-30			8.7	27.1	3590	293000			1.21	53.4	1		2562-01-28	Chronic cough, Wt loss	51, 57	44	0	2	0	0		8.8	27.3	3680	297000	103	45
S011	1	0	0	2562-02-01	46.6667	6	Mononeuritis multiplex	65	172	21.9713	2	3	1.2	Neuro	0		0	0		80	5.4	2562-02-01			14.1	41.9	5800	191000	19	16	0.82	106.1	1		2561-10-03	Neuropathy	46	66	1	2	3	8
S013	1	0	0	2562-02-04	29.5962	5	Fistular in ano	64	173	21.3839	1	3	2		0		2	0							15.2	43.6	4300	238000					0
S021	1	0	0	2562-02-16	25.8645	5	EDH	89	178	28.0899	1	0	0		0		0	0		429	20	2562-03-05			15.5	43.3	8410	224000	24	41	0.92	115.2	0
S023	1	0	0	2562-02-21	53.128	6	ITP	70	165	25.7117	2	3	1.2	Onco	0		2	3, 4		40	2.6	2562-02-25			13.7	39.7	8930	4000	93	182	0.9	97.2	0
S024	1	0	0	2562-02-22	37.3771	6	Stroke	70	172	23.6614	1	3	1.2	Neuro	0		0	0		280	18.5	2562-02-22			16.1	48	7220	250000	31	35	0.97	99.3	0
S027	1	1	0	2562-03-05	35.5921	5	PHT	50	145	23.7812	1	0	0		0		0	7	Epilepsy	326	14.1	2562-03-07			13.2	40.3	6670	317000	85	72	0.59	119.1	0
S028	1	0	0	2562-03-06	27.1814	5	Perianal abscess	76	173	25.3934	1	0	0		0		2	0		281	9.8	2562-03-18			14.9	43.7	11950	259000	27	42	0.84	120	0
S029	1	0	0	2562-03-12	42.3162	5	Septic shock				1	0	0		0		5	0		270	14	2562-03-12			14.5	40.1	18730	20000	941	221	0.82	109.1	0
S031	1	0	0	2562-04-19	29.8316	5	Meningitis	43	175	14.0408	1	0	0		0		5	0		10	1.4	2562-04-29			10.8	32.5	2850	172000			0.71	126.8	0
S032	1	1	0	2562-03-23	64.219	5	MHI				1	0	0		0		0	0							12.9	36.5	5870	142000			1	59.7	0
S033	1	0	0	2562-03-27	30.4175	5	Suicidal attemp	75	175	24.4898	1	0	0		0		2	0		24	2.7	2562-03-28			15.5	44.5	4730	175000	84	81	0.59	135.9	0
S034	1	0	0	2562-03-30	27.3018	5	Meningitis				1	0	0		0		5	0							13.5	37.9	23420	79000	64	47	1.14	87.7	0
S035	1	0	0	2562-04-01	19.9973	6	pulTB	55	168	19.487	2	3	1.2	Pulmo	0		0	0		101		2562-05-29											1		2561-12-04	Dermatitis	42	67	12	2	0	0
S037	1	0	0	2562-03-11	33.295	6	PPE, Wt loss, Oral trust	40	180	12.3457	1	3	1.2	Pulmo	0		2	0		27	4.5	2562-03-18			6.4	20.4	1420	286000	32	16	0.57	134.9	0
S038	1	1	0	2562-04-04	28.1889	5	Thyroid storm	70	161	27.0051	1	0	0		0		0	1, 3, 7	Thyrotoxicosis	773	37.4	2562-04-09			12.2	37.3	6350	173000	29	21	0.46	135.8	0
S039	1	0	0	2562-04-05	36.0082	5	Visual loss	46	155	19.1467	1	3	1.2	Neuro	0		0	0		351	17.7	2562-04-09			13.1	38.6	7490	290000	94	10	0.78	116.1	0
S041	1	1	0	2562-04-18	33.2074	0		55	170	19.0311	2	3	1.2	Pulmo	0		0	0		36	3	2562-04-30									0.64		0
S042	1	0	0	2562-04-10	33.8919	5	pulTB	58	175	18.9388	1	0	0		0		0	0		263	13.8	2562-04-11			8.1	24.5	10660	517000	51	44	0.58	134	0
S043	1	0	0	2562-03-21	22.3135	0		73	166	26.4915	2	3	1.2	Hemato	0		2	0							12.3	34.3	4770	294000	35	34	0.85	123.7	0
S047	1	0	0	2562-04-30	50.0671	6	pulTB	60	172	20.2812	2	3	1.2	Nephro	0		0	0		99	2.4	2562-05-10	425001	2562-05-10	15.5	45.7	8570	251000	21	16	0.78	105.3	1		2562-03-17	Chronic cough	57	66	6	0	0	0		16	46	7780	213000
S048	1	0	0	2562-05-02	29.2813	6	STD	76	163	28.6048	2	3	2		0		2	0		1010	38.1	2562-05-03			15.6	45.1	6800	96000			1	101.3	0
S049	1	1	0	2562-05-25	46.204	5	Lymphoma	50	160	19.5312	1	3	1.2	Nephro	0		0	0		71	7.7	2562-05-27			9.4	28.2	5600	331000	21	8	0.83	84.8	1		2562-05-24	Prolong fever, Wt loss	51, 56	51	1	2	0	0
S050	1	0	0	2562-05-07	33.473	5	TB Pleura	48	165	17.6309	1	0	0		0		0	0		147	31.3	2562-05-13			9	29.1	6280	504000	24	12	0.7	124	0
S051	1	1	0	2562-05-07	48.5503	5	AFI	52	155	21.6441	1	0	0		0		0	1, 3		248	12.8	2562-05-10			10.5	31.2	4500	206000	57	26	0.57	110	1		2562-03-27	Herpes zoster	40			2	3	6
S052	1	0	0	2562-05-07	57.7084	5	AFI	58	180	17.9012	1	0	0		0		0	0		195	19.4	2562-05-10			9.5	28.9	21190	265000	108	51	1.26	62.9	0
S054	1	1	0	2562-05-13	53.3415	5	Fatigue	65	160	25.3906	1	0	0		0		0	1, 3, 4, 7	HF, VHD, CA Thyroid	168	9.1	2562-05-14			10.9	32.8	6060	178000	38	18	0.89	74.2	0
S055	1	1	0	2562-05-16	35.3511	5	PCP	55	160	21.4844	1	0	0		0		0	0		9	2.4	2562-05-21			7.8	24.7	1870	249000	40	16	0.58	119.8	0
S058	1	0	0	2562-05-16	26.7871	7		88	175	28.7347	2	3	3		0		0	0		514	17.3	2562-05-23							29	20	1.17	100.4	0
S059	1	0	0	2562-05-25	39.6824	5	cFX	64	170	22.1453	1	0	0		0		0	0		328	12.6	2562-06-07			14.7	42.4	8900	161000	19	15	0.95	100.4	0
S060	1	0	0	2562-05-22	23.603	5	pulTB	42	161	16.2031	1	3	1.2	Gen	0		5	0		20	5.5	2562-05-23	519705	2562-05-23	8.2	24.7	13250	408000	51	62	0.76	128.6	0
S062	1	0	0	2562-05-31	41.911	6	PCP	62	170	21.4533	2	3	1.2	Pulmo	0		0	1		18	3.5	2562-06-11			11.6	33.5	10380	421000	57	65	0.77	112.7	0
S064	1	0	0	2562-06-05	37.5907	6	PPE	55	168	19.487	2	3	1.2	Onco	0		2	0		10	0.7	2562-06-07			13.6	40.1	4960	178000	34	45	0.84	111.9	0
S065	1	0	0	2562-06-07	42.4613	3		68	170	23.5294	2	0	0		0		0	0		248	15.6	2562-06-10			10.1	30	6130	280000	21	16	0.94	101.5	0
S067	1	0	0	2562-06-15	61.4511	5	Cellulitis	70	168	24.8016	1	0	0		0		0	0		538	16.2	2562-06-19			12.5	36.5	8330	397000	22	31	0.76	98.5	0
S068	1	1	0	2562-06-18	30.2697	5	CAPD Bleed	52	150	23.1111	1	0	0		0		0	5	ESRD	349	30.1	2562-06-20			8.9	27.8	6390	231000			11.3	4	0
S070	1	0	0	2562-06-27	47.5154	1		57	165	20.9366	1	3	1.2	Cardio	0		0	7	Aortic aneurism	44	5	2562-06-28			9.1	26.9	6860	251000			0.84	104.3	0
S072	1	0	0	2562-06-28	41.9576	5	pulTB	53.7	178	16.9486	1	0	0		0		0	0		54	5	2562-07-01			10.1	29.8	8920	274000	31	7	1.36	54.2	0
S074	1	0	0	2562-06-28	59.1157	5	AKI	56	175	18.2857	1	3	1.2	Nephro	0		0	3, 5, 7	CKD, Gout	110	9.6	2562-07-03			7.9	24.5	7640	310000	87	127	4.57	13	0
S075	1	0	0	2562-06-29	63.3785	5	Pneumonia	48	156	19.7239	1	0	0		0		0	0		26	2.8	2562-07-04			11.8	32.3	7670	282000	49	27	1	77	0
S076	1	0	0	2562-07-01	46.7515	3		60	175	19.5918	2	3	1.2	Pulmo	0		0	0		101	7	2562-07-01	66806	2562-07-08	15.3	45.6	7700	318000	41	29	0.85	104.5	0
S079	1	0	0	2562-07-05	54.4339	5	CA Esophagus	52	170	17.9931	1	0	0		0		0	0		338	24.1	2562-07-12			12.2	36.9	7850	299000			0.86	98.3	0
S081	1	1	0	2562-07-06	42.8474	5	PCP	68	162	25.9107	1	0	0		0		0	0		18	2.3	2562-07-08			12.8	38.6	11630	387000	57	29	1.93	31.5	0
S082	1	1	0	2562-07-10	54.8392	5	Fatigue	52	161	20.061	1	3	1.2	Gen	0		0	3, 4		325	16.3	2562-08-26	1409	2562-08-26	11.8	34.5	6120	232000	19	15	0.68	99.5	1		2562-06-12	Wt loss	51	52	0	2	3	1.2	Gen	12.9	38.8	8510	230000	21	17
S084	1	1	0	2562-07-18	40.6407	5	Chronic headache	46	150	20.4444	1	3	1.2	Nephro	0		0	0		7	1.3	2562-07-19			11.7	35.5	4870	295000	72	17	0.76	114.1	0
S085	1	0	0	2562-06-27	31.1841	6	PCP	47	169	16.456	0	3	4		0		2	0		6	1.2	2562-07-01			10.8	31.2	6330	189000	66	20	0.83	117.3	0
S086	1	0	0	2562-07-19	30.5873	0		58	175	18.9388	2	3	1.1		0		2	0		57	2.5	2562-07-19			14.4	41.7	12820	390000	28	33	1.04	95.9	0
S087	1	0	0	2562-07-22	26.6201	3		90	166	32.6608	2	3	1.1		0		0	0		395	22.7	2562-07-30							27	34	0.87	119.1	0
S088	1	1	0	2562-07-22	18.4394	4		49	170	16.955	2	0	0		0		0	0		171	16.1	2562-07-30			10.4	31.4	5630	300000	18	11			0
S089	1	1	0	2562-07-26	29.3662	4		55	165	20.202	2	3	3		0		0	0		506	17.8	2562-07-26			11.4	35.3	7520	183000	16	12	0.55	127.2	0
S091	1	1	0	2562-07-31	32.5941	0		61	167	21.8724	2	3	1.1		0		0	0		243	18.6	2562-11-08											0
S094	1	0	0	2562-07-31	28.7556	8		65	180	20.0617	2	0	0		0		0	0		37	4.6	2562-09-23			8.4	27.6	5550	368000			1.15	86.1	1		2562-05-01	Gonorhea	30	79	14	2	3	2
S096	1	0	0	2562-07-31	50.1081	0		57	169	19.9573	2	0	0		0		0	0		123	8.9	2562-10-11			12.7	37.5	4210	140000	19	6	0.95	93	0
S097	1	0	0	2562-07-31	32.0082	8		67	178	21.1463	2	0	0		0		0	0		218	19.5	2562-09-06			13.7	41.4	7360	241000	29	44	0.96	100.6	0
S099	1	0	0	2562-08-07	67.5948	5	STEMI	59	162	22.4813	1	0	0		0		0	3		365	17.4	2562-08-08			12.3	35.6	9290	245000			0.81	92	0
S101	1	0	0	2562-08-14	48.9555	5	PCP	60	170	20.7612	1	0	0		0		0	0		18	3.2	2562-08-15			16.4	48.2	5030	261000	51	28	0.95	94.3	0
S102	1	0	0	2562-08-16	20.1451	6	Syphilis	83	170	28.7197	2	3	1.2	Skin	0		0	0		555	32.5	2562-08-19			15	45.8	7850	436000					0
S103	1	1	0	2562-08-16	32.3833	6	pulTB	52	160	20.3125	2	3	1.2	Pulmo	0		0	0		162	9.8	2562-09-18			13.1	40	6550	279000	24	17	0.62	119.7	0
S104	1	0	0	2562-08-02	37.8508	6	pulTB, PPE, Oral trust	60	172	20.2812	2	1	1.2	Gen	0		0	0		73	6.3	2562-08-09			9.4	27.6	9790	223000	32	19	0.97	99.3	1		2562-07-27	Chronic cough, Oral trust	52, 57	60	0	0	0	0		9.3	27	8240	196000	22	19
S107	1	0	0	2562-08-20	16.6324	6	Perianal abscess	90	176	29.0548	2	3	2		0		2	0		188	11.2	2562-08-20			11.7	36.4	7140	294000	25	22	0.94		1		2562-02-21	Cervical LN, IM	33, 61	95	5	2	0	0
S108	1	1	0	2562-08-27	53.9658	5	Chronic diarrhea	37	145	17.5981	1	3	1.2	Nephro	0		0	0		222	7.8	2562-08-29			9.4	27.3	6850	216000	43	36	0.91	72.3	1		2562-08-20	Chronic diarrhea, Wt loss	51, 53	37	0	2	3	1.2	Rheumato
S109	1	1	0	2562-07-31	30.9925	0		53	150	23.5556	2	3	1.2	Cardio	0		0	0		415	24.8	2562-08-05	747	2562-08-05	12.8	37.9	5800	394000	23	24	0.57	123.9	1		2562-02-26	LSIL	39	53	0	2	3	3
S110	1	0	0	2562-08-29	61.6564	5	pulTB	60	169	21.0077	1	3	1.1		0		0	0							6	18.9	5460	77000	19	9	0.81	95.9	0
S113	1	1	0	2562-09-02	47.0472	3		46	145	21.8787	2	3	1.2	Immuno	0		0	0		67	4.1	2562-09-02			10	31.1	4960	306000	22	12	0.79	89.4	0
S115	1	0	0	2562-09-03	28.9172	0		49	164	18.2183	2	0	0		0		2	0		185	12.5	2562-09-03			13.4	41.1	3870	95000	23	26	0.72	127	0
S117	1	0	0	2562-09-06	55.3949	6	Chronic cough, Wt loss				2	1	1.2	Gen	0		0	0							11.1	33.8	7450	314000	55	34	0.87	97.2	0
S122	1	1	0	2562-09-18	57.5113	3		60	150	26.6667	2	0	0		0		0	1, 3, 4, 5	CKD	229	9.2	2562-09-18			13.5	42.4	8520	238000	25	19			0
S124	1	0	0	2562-09-18	41.1362	5	Meningitis	40	165	14.6924	1	3	4		0		0	0		17	2.7	2562-09-20			12.5	36.3	5540	255000	19	23	0.74	114.6	0
S125	1	0	0	2562-09-20	34.0698	7		70	170	24.2215	2	0	0		0		0	0											42	76			0
S126	1	0	0	2562-07-24	42.0862	5	ACS				1	0	0		0		0	0		248	11.6	2562-07-25			14.9	42.4	5920	137000	22	20	0.79	110.8	0
S127	1	0	0	2562-09-24	60.2327	5	Prolong fever	70	167	25.0995	1	3	1.2	Endo	0		0	3, 4		62	3.6	2562-09-25			13.1	39	5480	185000	54	51	0.79	97.6	1		2562-09-03	Prolong fever	56	77	7	2	3	1.2	Endo	13	38.2	4550	144000	55	67
S128	1	0	0	2562-09-26	45.6345	6	Cervical LN	46	165	16.8962	2	3	7		0		0	0		105	16.2	2562-10-03			12	36.1	6700	343000	37	13	0.82	106.8	1		2562-08-27	Cervical LN	33	45	-1	2	3	7
S130	1	0	0	2562-09-29	30.3874	5	PCP	79	173	26.3958	1	0	0		0		0	0		10	1.5	2562-09-30			15.7	46.2	3350	180000	50	35	1.03	97	0
S131	1	0	0	2562-10-04	41.3799	6	PPE	51	152	22.0741	2	0	0		0		2	0		269	18.6	2562-11-01			13.8	39.9	8140	224000	25	36	0.88	106.7	0
S132	1	1	0	2562-10-04	41.7112	5	Toxoplasmosis of brain	47	155	19.563	1	3	1.2	Hemato	0		0	0		45	9	2562-10-08			9.8	28.6	5110	302000	23	18	0.54	117.6	0
S133	1	0	0	2562-10-04	55.8001	5	Cholangio CA	71	175	23.1837	1	0	0		0		0	1, 3, 4		223	16.1	2562-10-07			12	33.6	11410	144000	51	19	1.89	39.1	0
S135	1	0	0	2562-10-10	33.8261	6	Chronic diarrhea, PPE	58	165	21.3039	2	3	1.2	GI	1	2562-08-04	0	0		88	9.7	2562-10-11			9.4	28	4300	147000	50	52	0.94	106.1	0
S136	1	0	0	2562-10-11	22.7981	0		65	167	23.3067	2	3	1.1		0		2	0		250	12.5	2562-10-11			15.3	46.5	6280	256000	28	45	0.91	119.2	0
S137	1	1	0	2562-10-11	46.6749	5	CA Ovary	70	160	27.3438	1	3	4		0		0	1, 3, 4		321	33.8	2562-10-15			11.7	35.1	16420	625000	15	5	0.95	72.1	0
S138	1	1	0	2562-10-18	16.8131	6	Herpes zoster	62	162	23.6244	2	0	0		0		0	0		604	23.5	2562-10-18											0
S139	1	1	0	2562-10-11	45.5469	5	Anemia	45	160	17.5781	1	3	1.2	Nephro	0		0	0		25	4.4	2562-10-15			5.9	18.8	5210	397000	32	19	1.26	51.6	0
S141	1	0	0	2562-10-21	23.3347	5	Anal wart	75	180	23.1481	1	3	2		0		2	0							13.8	45.2	8410	194000					2		2562-10-10	Anal wart	30, 54	75	0	2	3	2
S142	1	1	0	2562-09-16	54.4066	5	Abscess	56	165	20.5693	1	3	2		0		0	5	CKD	145	7.3	2562-10-22			8.5	26.2	9160	235000			5.43	8.28	0
S143	1	0	0	2562-10-25	45.7029	5	Septic shock	50	165	18.3655	1	3	4		0		0	0		27	5.4	2562-10-28			10.3	31.5	11950	213000	40	18	2.51	29.7	0
S144	1	0	0	2562-10-27	25.7988	5	PCP				1	0	0		0		5	0		15	2.6	2562-10-29			10.6	33.5	19590	546000	41	15	0.6	139.7	0
S145	1	0	0	2562-10-28	29.9411	5	PCP	59	169	20.6575	1	3	4		0		5	0		51	4	2562-10-30			8.8	29.3	5280	261000	63	14	0.69	128.3	0
S146	1	1	0	2562-10-28	15.1431	6	PPE	43	153	18.369	2	3	1.2	Skin	0		0	0		41	4.6	2562-11-01			10.1	31.6	4390	234000	38	17	0.48	174	0
S148	1	0	0	2562-11-03	68.835	5	HF	71	155	29.5525	1	3	1.2	Gen	0		0	1, 3, 4		405	17.5	2562-11-06			12.7	37.9	9300	326000	70	60	0.85	89.5	0
S150	1	0	0	2562-11-07	21.8535	0		65	177	20.7476	2	3	1.1		0		2	0		514	25.1	2562-11-08			13.8	43.1	6810	291000	15	15	0.79	128	0
S151	1	0	0	2562-09-13	53.6756	6	Anal wart	56	162	21.3382	2	3	1.2	Skin	0		2	1, 4		253	16.9	2562-11-08	2705	2562-12-03	12	37.6	4750	251000	22	7	1.2	68.6	1		2562-09-12	Anal wart	30, 54			2	3	2
S152	1	1	0	2562-11-10	60.4956	1		43	150	19.1111	1	3	2		0		0	7	CA Breast	330	14.1	2562-11-11			10	32.8	8140	472000	23	6	0.69	94.9	0
S154	1	0	0	2562-11-12	44.8296	6	Retinitis	58	170	20.0692	2	3	6		0		5	0		344	15.1	2562-11-18			13.1	41.2	7560	325000	10	9	0.72	113.5	0
S155	1	1	0	2562-11-18	17.1499	6	OSCC	46	150	20.4444	2	3	1.1		0		0	0		199	14.6	2563-01-21											0
S156	1	0	0	2562-11-18	57.8782	5	PCP, pulTB	53	165	19.4674	1	0	0		0		0	0							10.1	30.8	6750	274000	54	32	0.88	95.4	0
S157	1	0	0	2562-11-05	37.6564	5	Liver mass	50	165	18.3655	1	0	0		0		2	0		16	3.5	2562-11-06			9.7	32.2	4150	426000	47	45	0.78	115	1		2562-10-15	Anal wart	30, 54	56	6	2	3	2
S158	1	0	0	2562-11-21	17.5086	6	AFI	38	162	14.4795	2	3	1.2	Nephro	0		2	0		299	12.5	2562-11-22			15	45.5	5910	294000	18	18	1.02	96.2	0
S159	1	0	0	2562-11-23	46.4832	5	Chronic cough, Wt loss	72	170	24.9135	1	0	0		0		0	0		39	4.5	2562-11-26			12.5	37.4	7180	486000	21	12	1.1	80	0
S160	1	0	0	2562-11-30	33.128	5	Spinalcord tumor	50	160	19.5312	1	0	0		0		5	0		70	7.5	2562-12-09			14	45	2790	216000	21	13	0.79	118	0
S161	1	0	0	2562-12-01	23.7399	5	Drug abuse	53.5	169	18.7318	1	0	0		0		0	0		409	17	2562-12-02			15.2	46.5	5820	310000	66	37	0.73	130.7	1		2560-11-28	GC Urethritis	30	55	1.5	2	3	2
S163	1	0	0	2562-11-04	52.5613	6	PPE	45	155	18.7305	2	3	1.2	Skin	0		0	0		8	1.1	2562-12-03			11	35.1	5180	277000	22	20	0.71	107.8	1		2562-11-02	Folliculitis DDx PPE	59			0	0	0
S166	1	0	0	2562-12-09	61.7358	5	Dissem TB	59	170	20.4152	1	3	1.2	Pulmo	0		0	0		50	19.3	2562-12-11			10.2	32.7	11280	148000	63	25	1.24	62.4	2		2562-12-07	pulTB	20, 51			0	0	0						52	19
S167	1	0	0	2562-12-11	53.1554	6	Fatigue, Wt loss	45	170	15.5709	2	3	1.2	Rheumato	0		5	0		102	9.8	2563-01-09			9.9	30.6	3730	410000	17	9	0.84	99.9	0
S168	1	0	0	2562-12-13	49.5469	5	Corneal ulcer	58	165	21.3039	1	3	6		0		0	0		148	8.6	2562-12-17	263602	2562-12-17	13.3	41.7	6800	304000	16	17	0.77	106.5	0
S169	1	0	0	2562-12-13	62.4559	5	PCP, Dermatitis	44	165	16.1616	1	3	1.2	Neuro	0		0	0		108	6.4	2562-12-16			10	30.1	4190	176000	18	10	1.28	59.5	0
S170	1	0	0	2562-11-18	44.2793	6	PPE	79	174	26.0933	2	3	1.2	Skin	0		0	0		25	2.3	2562-12-16			14.1	43.3	5490	214000	43	78	1.03	87.9	0
S172	1	0	0	2562-12-22	63.7235	1		62	160	24.2188	1	3	6		1	2562-03-26	0	1, 3, 5, 7	CKD, CLL	285	14	2563-01-02			4.7	16	3770	336000	44	45	1.35	55.5	0
S173	1	1	0	2562-11-01	64.8296	6	Oral hairly leukiplakia	45	162	17.1468	2	3	1.2	Skin	0		0	0		11	1.7	2562-12-27							22	12			0
S174	1	1	0	2562-12-26	42.6201	5	HBV Hepatitis	56	160	21.875	1	0	0		0		0	0		25	1.5	2563-01-02			12.3	35.1	5410	135000	164	82	0.61	112.1	0
S178	1	1	0	2562-12-02	56.6461	1		58	153	24.7768	2	3	6		0		0	0		403	20.4	2563-01-24			14.3	42.4	5710	192000			0.84	78	0
S185	1	0	0	2563-01-28	18.4914	6	Syphilis	46	175	15.0204	2	3	1.2	Immuno	0		5	0		605	23.2	2563-02-11			14.2	44.8	5450	204000	19	12	1.2	87.7	0
S186	1	0	0	2563-01-30	24.3368	0		50	175	16.3265	2	3	1.1		0		0	0		234	22.4	2563-01-31			14.3	42.6	4450	224000	22	17	0.89	119.5	0
S190	1	0	0	2563-01-22	43.9507	5	Gut obstruction	54	160	21.0938	1	0	0		0		0	0		311	12.3	2563-02-17			12.4	37	17880	341000	24	32	1.74	47	0
S193	1	0	0	2563-02-26	33.5003	7		72	180	22.2222	2	0	0		0		0	0		339	19.7	2563-02-27			14.8	45.1	6390	280000	28	14	0.98	100.9	0
S198	1	0	0	2563-03-08	34.1547	6	pulTB	75	170	25.9516	2	3	1.2	Pulmo	0		0	0		31	2.4	2563-03-09			8	25.5	12350	323000	30	26	0.96	102.7	0
S202	1	0	0	2563-03-30	39.039	6	Wt loss	51	165	18.7328	2	0	0		1	2558-01-01	2	6	HBV	152	8.4	2563-03-30			9.9	31.1	8370	299000	33	29	0.91	105.8	0
S203	1	1	0	2563-01-30	43.7509	0		52	155	21.6441	2	3	1.1		0		0	0		153	9.8	2563-03-20			9.9	29	5390	238000	22	12	0.68	107.5	0
S204	1	0	0	2563-02-28	23.1102	0		74	175	24.1633	2	3	1.1		1	2561-11-06	2	0		348	13.5	2563-02-28			15	45.1	7870	302000	33	40	0.94	113.8	0
S208	1	0	2	2563-03-04	37.3717	5	Meningitis	55	163	20.7008	1	3	1.2	Neuro	0		0	0		204	16.9	2563-03-10	128840	2563-03-10	10.6	30.8	2980	49000	45	21	0.73	118.5	0
S209	1	0	0	2563-03-27	61.6619	5	Bronchitis	55	157	22.3133	1	0	0		0		0	2	DVD	342	20.3	2563-03-30			11.6	35.1	15760	264000			1.15	68.3	0
S210	1	0	0	2563-03-31	38.4668	5	Nephrotic syndrome	58	155	24.1415	1	0	0		0		5	0		181	10.9	2563-04-02			7.4	22.8	9410	145000	29	14	1.74	48.6	1		2560-03-27	Herpes zoster	40	55	-3	2	3	1.2	Gen
S211	1	0	0	2563-02-12	45.4209	5	pulTB	36	165	13.2231	1	3	4		0		0	3, 4		18	2.9	2563-03-02			9.5	28.4	14490	411000	105	48	1.04	86.3	0
S212	1	0	0	2563-04-12	34.976	6	PPE	69	164	25.6544	0	3	4		0		2	0		225	12.8	2563-04-13			13.3	38.9	6150	53000	38	40	1.07	90	0
S216	1	0	0	2562-12-03	28.1725	5	Cellulitis	54	168	19.1327	1	0	0		0		5	0		16	1.4	2562-12-04			12.8	39.4	9710	159000	19	12	1.51	62	0
S217	1	0	0	2563-03-24	51.1239	6	Bronchitis	67	165	24.6097	2	0	0		1	2560-09-25	0	0		408	23.6	2563-05-05			14.6	42.4	6570	413000	43	72	0.84	101.4	0
S222	1	0	0	2563-04-24	33.4374	0		67	167	24.0238	2	3	1.1		0		2	0		220	10.4	2563-04-24			13.8	44.1	5960	264000	30	19	0.77	119.2	0
S223	1	0	0	2563-01-16	49.8207	5	Brain abscess	65	178	20.5151	1	0	0		0		0	0		30	6.4	2563-01-17			15.5	45.1	3980	222000	38	27	0.63	112.8	0
S230	1	0	0	2562-12-27	29.1335	6	Cervical LN, Wt loss	43	159	17.0088	2	3	1.1		0		0	0		54	10.7	2563-01-10			9.2	29.2	8970	158000	51	46	0.96	106.4	0
S237	1	0	0	2563-04-18	55.3949	5	Dyspepsia	47	162	17.9089	1	0	0		0		5	0		392	12.3	2563-04-27			12.9	39.8	9930	662000	14	7	0.61	112.4	0
S241	1	0	0	2563-05-15	16.345	5	Tendon injury	70	176	22.5981	1	3	4		0		2	7	Depression	721	26.9	2563-05-18			13.3	39.6	10460	282000			0.86	118.6	0
S245	1	0	0	2563-04-14	45.1937	6	Cervical LN	77	184	22.7434	2	3	7		0		2	0		98	16.2	2563-05-22			12.7	38.9	5060	251000	49	48	1.25	69.1	0
S251	1	0	0	2563-06-19	20.6954	0		50	175	16.3265	2	3	1.1		0		0	0		429	20.7	2563-06-19			12.6	37.6	5140	335000	24	12	1.31	77.8	0
S252	1	1	0	2563-07-02	24.7995	6	PPE	54	165	19.8347	2	0	0		0		0	0		27	4.6	2563-07-03			9.9	30.1	1860	186000	24	10	0.49	136.8	0
S259	1	1	0	2563-07-23	41.4867	6	PPE, Wt loss	64	160	25	2	0	0		0		0	0		65	8.6	2563-07-23			11.1	34.8	4290	209000	46	39	0.57	115.5	0
S260	1	1	0	2563-07-20	23.0308	6	PPE	48	159	18.9866	2	3	1.2	Skin	0		0	0		7	1	2563-09-17			11.8	36.6	7170	315000	44	25	0.64	126.2	1		2563-06-05	Dermatitis	42			2	0	0
S261	1	1	0	2563-07-24	24.8761	5	Pneumonia	58	145	27.5862	1	0	0		0		0	0		412	22.9	2563-08-07			12.7	38.6	5410	326000	17	16	0.69	122.2	0
S264	1	0	0	2563-11-13	24.668	0		93	172	31.4359	2	3	1.1		0		2	0		289	16.9	2563-11-13			14.8	44	6200	278000	22	41	0.97	108.8	0
S266	1	1	0	2563-02-24	69.1444	3		40	145	19.025	2	3	1.2	Gen	0		0	0		161	17.9	2563-08-17											0
S267	1	0	0	2563-03-02	19.9179	6	Cervical LN	52	160	20.3125	2	3	1.2	Hemato	0		2	0		466	19.8	2563-03-02			15.3	47.4	6720	161000	20	15	1.29	79.8	0
S268	1	0	0	2563-07-20	49.5524	5	Acute diarrhea	51	165	18.7328	1	0	0		0		0	0		16	3	2563-07-22			11.8	32.2	5310	313000	27	19	1.44	56.6	0
S270	1	0	0	2563-06-18	30.1164	5	Polyarthritis	55	166	19.9594	1	0	0		0		2	0		122	9.3	2563-06-19			5.9	18.1	7980	426000	55	63	0.86	116.3	0
S273	1	1	0	2563-09-01	27.3621	3		64	150	28.4444	2	0	0		0		0	0		686	18.7	2563-09-02			13.8	42.6	7660	283000	18	22	0.69	119.7	0
S277	1	1	0	2563-06-15	44.2053	5	pulTB	45	155	18.7305	1	3	1.1		0		0	0		332	19.4	2563-06-16			9	27.5	5070	237000	48	27	0.61	110.6	0
S280	1	1	0	2563-09-08	41.4374	1		49	157	19.8791	2	3	1.2	Gen	0		0	0		124	9.7	2563-09-10			11.1	36.3	3020	265000	27	22	0.56	116.2	2		2563-08-25	Dyspepsia	34, 51	50	1	2	3	1.2	Gen	10.1	32.3	3310	250000
S282	1	1	0	2563-07-12	45.4292	5	HSV Encephalitis	67	165	24.6097	1	0	0		0		0	0		240	13.1	2563-07-13			11.8	35.5	18090	255000	27	18	0.78	92.1	0
S283	1	1	0	2563-09-02	23.0335	6	Headache, Wt loss	60	170	20.7612	2	3	1.1		0		0	7	Asthma	306	18.1	2563-09-08			11.1	33.6	4290	199000	19	20	0.73	116.5	0
S284	1	1	0	2563-07-21	53.9165	5	LBP	55	155	22.8928	1	3	8		0		0	0		230	12.1	2563-09-01			11.1	35.5	6760	416000	57	40	1.38	43.7	0
S291	1	1	0	2563-09-24	58.2313	6	Chronic cough, Wt loss	53	158	21.2306	2	0	0		0		0	1		81	13.8	2563-09-25			8.3	25.6	3110	245000	16	9	0.57	102.5	4		2563-08-11	LSIL	39			2	3	3
S296	1	0	0	2563-10-14	28.8515	8		59	165	21.6713	2	3	1.1		0		2	0		248	13.8	2563-10-22			13.6	41.7	7240	244000	14	18	0.88	116.9	0
S298	1	0	0	2563-09-29	23.0938	2		61	170	21.1073	2	0	0		0		2	0		268	14	2563-10-21			15.6	47.6	6140	228000	20	24	0.81	125.3	0
S302	1	1	0	2563-11-02	51.7864	6	PPE	65	155	27.0552	2	0	0		0		0	0		359	22.9	2563-11-02			11.8	36	5320	353000	22	9	0.58	107	0
S303	1	0	0	2563-10-09	16.0301	0		82	180	25.3086	2	3	1.1		0		2	0		465	17	2563-10-09			15.6	45.7	8520	337000	18	21	0.93	108.4	0
S307	1	1	0	2563-09-26	29.4182	5	Meningitis	50	155	20.8117	1	0	0		0		0	0		2	0.3	2563-09-28			10.4	32.1	5840	243000	22	14	0.58	125	0
S312	1	1	0	2563-11-06	20.0876	3		45	158	18.026	2	3	1.1		1	2560-10-15	0	0		852	26.7	2563-11-13			12.7	40.3	7270	282000	19	16	0.57	133.9	0
S313	1	0	0	2563-10-30	28.731	0		62	178	19.5682	2	3	1.2	Gen	1	2560-11-27	2	6	HBV	391	20.1	2563-10-30											0
S315	1	0	0	2563-11-26	42.7926	0		71	159	28.0843	2	0	0		0		0	0		195	10.1	2563-11-27											0
S318	1	0	0	2563-10-24	25.0322	5	PCP, AKI	65	180	20.0617	1	0	0		0		0	0		167	20	2563-10-25			5.7	16.1	7140	100000	33	16	27.5	1.89	0
S319	1	1	0	2563-10-03	76.7502	5	pulTB	36	150	16	1	3	4		0		0	0		26	6.1	2563-10-05			8.2	24.2	7410	381000	50	26	0.83	68.7	1		2563-09-29	Cervical LN	33	36	0	2	3	7
S320	1	1	0	2563-10-20	18.5927	6	Prolong fever, Wt loss	53	164	19.7055	2	3	1.2	Nephro	0		0	0		69	4.1	2563-10-20			9.4	29	8830	253000	19	23	0.54	138	1		2563-10-15	Subacute fever, Wt loss	51, 55	53	0	2	0	0		10.2	31.2	6150	255000	15	18
S323	1	0	0	2563-10-14	61.9986	5	Lung nodule, AKI	78	164	29.0006	1	3	1.2	Pulmo	0		0	3		26	2.8	2563-10-15			12.4	36.5	8840	188000	18	23	1.26	60.7	0
S325	1	0	0	2563-12-04	18.3217	0		89	170	30.7958	2	3	1.1		0		2	0		844	30.4	2563-12-04			14.7	47.2	7740	255000	28	47	0.69	138.9	0
S327	1	0	0	2563-10-02	25.6181	6	pulTB	50	180	15.4321	2	3	1.2	Pulmo	0		5	0		230	17.2	2563-10-30			12.6	42.8	10900	379000	53	70	1.13	89.8	0
S328	1	0	0	2563-10-23	36.4107	5	pulTB	50	176	16.1415	1	3	4		0		0	0		11	4.3	2563-10-27			8.7	26.2	2410	175000	87	31	0.96	101.3	0
S330	1	0	0	2563-10-22	65.191	5	PCP	49	162	18.6709	1	0	0		0		5	0		11	1.4	2563-10-26			10.3	32.9	4510	346000	29	15	0.68	100.2	0
S331	1	0	0	2563-06-11	25.1362	0		56	180	17.284	2	0	0		0		5	0		5	0.7	2563-10-14											0
S336	1	1	0	2563-01-03	53.5743	5	Urticaria	48	147	22.213	1	3	1.2	Nephro	0		0	0		257	12.5	2563-01-16	365080	2563-01-16	10.8	32.6	8030	406000	37	76	1.34	45.2	0
S347	1	0	0	2563-02-24	47.937	5	PCP	49	175	16	1	0	0		0		0	0		10	1.3	2563-02-25			8.7	25.6	10020	290000	84	17	0.88	102.3	0
S354	1	1	0	2563-04-14	25.9001	5	HF	40	142	19.8373	1	0	0		0		0	7	VHD	393	23.6	2563-04-14			14.1	44	10970	85000	23	21	0.74	113	0
S356	1	1	0	2563-05-01	33.8782	6	Herpes zoster	46	150	20.4444	2	3	1.2	Skin	0		0	0		90	8.4	2563-05-15			13.5	41.2	4780	235000	23	19	0.82	94.3	1		2563-04-30	Herpes zoster	40			2	0	0
S361	1	0	0	2563-06-05	22.1109	0		55	175	17.9592	2	3	1.1		0		2	0		421	13.4	2563-06-05			14.1	42.8	6290	298000	20	29	0.88	121.9	0
S366	1	0	0	2563-06-16	33.18	5	Ischemic stroke	125	181	38.1551	1	0	0		0		2	0		18	1.2	2563-06-17			14.5	44.9	5340	205000	33	22	0.62	130.3	0
S370	1	1	0	2563-03-20	23.2608	4		52	150	23.1111	2	3	3		0		0	0		415	26.3	2563-03-20			11	34	7190	304000	16	12			0
S374	1	0	0	2563-07-10	44.5941	6	pulTB	52	162	19.8141	2	0	0		0		0	0		65	5.1	2563-07-10			11.2	33.9	10030	435000	23	17	0.74	112.2	0
S381	1	0	0	2563-07-16	30.5352	7		52	161	20.061	2	3	3		0		0	0		311	15.3	2563-09-02			13.3	38.2	5310	241000	21	16	0.71	125.9	0
S386	1	1	0	2563-09-21	19.0171	0		50	155	20.8117	2	3	1.1		1	2560-05-03	0	0		190	7.8	2563-09-21			11.4	34.7	5920	191000	23	14	0.75	115.9	0
S397	1	1	0	2563-08-03	24.7255	6	Chronic cough, Wt loss	45	160	17.5781	2	3	1.1		0		0	0		29	2.1	2563-08-04			8.7	28.1	9870	462000	16	9	0.52	134.2	1		2563-07-29	Chronic cough, Wt loss	51, 57	46	1	2	0	0
S401	1	1	0	2563-11-17	49.6646	6	pulTB	41	145	19.5006	2	0	0		0		0	0		379	31.4	2563-11-17			11.7	36.8	6680	346000	45	22	0.54	111.2	0
S402	1	1	0	2563-10-20	60.3806	5	Bicytopenia	38	143	18.5828	1	3	1.2	Hemato	0		0	3, 7	Anemia	62	9	2563-10-21			7.9	25.4	6810	34000	70	44	0.81	79.2	7		2563-10-05	Eczema, Wt loss	51, 58	38	0	2	3	1.2	Skin
S409	1	0	0	2563-04-16	33.8782	0		71	170	24.5675	2	3	1.1		0		0	0		123	11.3	2563-04-16			16.7	47.3	6080	213000	38	37	0.97	102.1	0
S410	1	1	0	2563-04-28	69.6756	3		46	150	20.4444	2	3	1.2	Endo	0		0	7	Cataract	348	21.9	2563-04-28	4139	2563-04-28	12.6	36.8	5130	179000	20	10	0.87	68.2	0
S411	1	0	0	2563-04-19	66.2642	5	Ischemic stroke	83	180	25.6173	1	0	0		0		0	0		87	13.5	2563-04-21			14.7	43	5020	168000			1.26	59.1	0
S414	1	0	0	2562-12-13	41.0349	6	Cervical LN	54	170	18.6851	2	3	7		0		5	0		123	12	2563-01-28			8.8	29	11720	358000	27	11	0.97	96.6	0
S415	1	1	0	2563-01-22	41.9904	5	HBV Hepatitis	56	159	22.151	1	3	1.2	Hemato	0		0	0		229	11.7	2563-01-23			10.5	29.2	8110	173000	622	498	0.58	114.9	0
S416	1	0	0	2563-08-13	61.3443	6	HCV	66	170	22.8374	2	3	1.1		1	2559-01-01	0	6	HCV c SVR	460	22.1	2563-08-17			14.5	41.8	5340	164000	95	129	1.08	73.7	0
S418	1	1	0	2563-09-23	34.1766	3		48	155	19.9792	2	3	1.1		0		0	0		501	16.5	2563-09-23			11.8	35.1	6260	234000	29	26	0.68	114.5	0
S420	1	0	0	2563-08-03	45.3443	5	CIDP	78	186	22.546	1	3	1.2	Neuro	0		0	7	HNP	438	15.9	2563-08-05			13	37.6	7140	148000	28	38	0.62	119.8	0
S421	1	0	0	2563-11-09	36.6461	6	pulTB	51.5	173	17.2074	2	0	0		0		5	0		57	5.7	2563-11-09			8.7	25.6	6060	247000	34	20	0.88	110.5	0
[truncated: 241 more columns]

## Sheet: Description
Hospital	Gender	Race	Reasons for testing	Site of testing	Ordered physician	Specialty	Prior HIV test	HIV risk	U/D	Missed	CODE
0=Rama	0=male	0=Thai	0=Self testing	0=ER	0=GP	0=NA	0=No	0=Heterosexual	0=No	Bacterial pneumonia, recurrent	1
1=SPR	1=female	1=Cambodia	1=Pre-op lab	1=Inpatient care	1=Resident	1=Medicine	1=Yes	1=IVDU	1=DM	Candidiasis of bronchi, trachea, or lungs	2
		2=Myanmar	2=Check up	2=Outpatient care	2=Fellow	1.1=ID		2=Homosexual	2=CAD	Candidiasis of esophagus	3
		3=Laos	3=Couple positive		3=Staff	1.2=non-ID		3=Blood Transfusion	3=HT	Cervical cancer, invasive	4
			4=ANC			2=Surgery		4=Bisexual	4=DLP	Coccidioidomycosis (disseminated or extrapulmonary)	5
			5=Admission lab			3=OB&GYN		5=Unknown	5=Renal disease	Cryptococcosis (extrapulmonary)	6
			6=Doctor suspicion			4=Emergency medicine		6=Tattoo	6=Liver disease	Cryptosporidiosis, chronic intestinal (>1 month)	7
			7=ANC(husband)			5=Family medicine			7=Others	Cytomegalovirus disease (not liver, spleen, or nodes)	8
			8=Prison screening			6=Eye				Cytomegalovirus retinitis (with loss of vision)	9
						7=ENT				Encephalopathy, HIV related (dementia)	10
						8=Orthopedics				Herpes simplex: chronic ulcers (>1 month)	11
						9=PM&R				Histoplasmosis, disseminated or extrapulmonary	12
						10=Psychiatrist				Isosporiasis, chronic intestinal (>1 month)	13
						11=Dentist				Kaposi Sarcoma	14
						12=Anes				Lymphoma, Burkitt	15
						13=Preventive medicine				Lymphoma, immunoblastic (or equivalent term)	16
						14=RT				Lymphoma, primary of brain	17
						15=Ped				M.avium/M.kansassi disseminated or extrapulmonary	18
										M. tuberculosis (disseminated or extrapulmonary)	19
										M. tuberculosis (pulmonary)	20
										Mycobacterium, other species or unidentified species	21
										Pneumocystis pneumonia	22
										Progressive multifocal leukoencephalopathy	23
										Toxoplasmosis of brain	24
										Wasting syndrome attributed to HIV	25
										Nocardiosis	26
										Penicilliosis	27
										Rhodococcosis	28
										Oral hairy leucoplakia	29
										Sexually transmitted infections*	30
										Hepatitis B	31
										Hepatitis C	32
										Unexplained lymphadenopathy	33
										Unexplained leukocytopenia/thrombocytopenia persisting for >4 weeks	34
										Severe or atypical psoriasis	35
										Lymphoma*	36
										Lung carcinoma	37
										Anal carcinoma/dysplasia*	38
										Cervical dysplasia*	39
										Herpes zoster in an individual <50 years old*	40
										Unexplained chronic renal impairment	41
										Dermatitis / seborrhoeic rash*	42
										Invasive pneumococcal disease	43
										Candidaemia	44
										Visceral leishmaniasis	45
										Peripheral neuropathy of unknown origin	46
										Guillain-Barré syndrome	47
										Mononeuritis	48
										Sub-cortical dementia	49
										Multiple sclerosis-like disease	50
										Unexplained weight loss	51
										Unexplained oral candidiasis	52
										Unexplained chronic diarrhoea	53
										Anal wart	54
										Subacute fever	55
										Prolong fever	56
										Chronic cough	57
										Eczema	58
										Folliculitis	59
										Tonsillitis (Recurrent)	60
										Infectious mononucleosis	61
